# Supplementary material for: Niobium-promoted reaction of α-phenylglyoxylic acid with ortho-functionalized anilines: synthesis of 2-arylbenzothiazoles and 3-aryl-2H-benzo[b][1,4]benzoxazin-2-ones
Source: Royal Society of Chemistry journal article supplement (doi:10.1039/c6gc02495e), 2016-01-01
Supplement: c6gc02495e1.pdf [file c6gc02495e1.pdf]

## **Niobium-promoted reaction of $\alpha$ -phenylglyoxylic acid with *ortho*-functionalized anilines: synthesis of 2-arylbenzothiazoles and 3-aryl-2*H*-benzo[*b*][1,4]benzoxazin-2-ones**

Filipe Penteado,<sup>a</sup> Marcelo M. Vieira,<sup>a</sup> Gelson Perin,<sup>a</sup> Diego Alves,<sup>a</sup> Raquel G. Jacob,<sup>a</sup> Claudio Santi,<sup>b</sup> Eder J. Lenardão\*<sup>a</sup>

<sup>a</sup> Laboratório de Síntese Orgânica Limpa - LASOL - CCQFA - Universidade Federal de Pelotas - UFPel - P.O. Box 354 - 96010-900, Pelotas, RS, Brazil. \* Email: lenardao@ufpel.edu.br

<sup>b</sup> Department of Pharmaceutical Sciences Group of Catalysis and Organic Green Chemistry - University of Perugia, Via del Liceo 1- 06100 Perugia Italy.

**General Information:** The reactions were monitored by TLC carried out on Merck silica gel ( 60 F<sub>254</sub> ) by using UV light as visualization agent and the mixture between 5% of vanillin in 10% of H<sub>2</sub>SO<sub>4</sub> under heating conditions as developing agents. Merck silica gel (particle size 0.040-0.063 mm) was used to flash chromatography. Hydrogen nuclear magnetic resonance spectra (<sup>1</sup>H NMR) were obtained at 400 MHz on Bruker Nuclear Ascend 400 spectrometers. The spectra were recorded in CDCl<sub>3</sub> solutions. The chemical shifts are reported in ppm, referenced to tetramethylsilane (TMS) as the external reference. Hydrogen coupling patterns are described as singlet (s), doublet (d), triplet (t) and multiplet (m). Coupling constants (*J*) are reported in Hertz. Carbon-13 nuclear magnetic resonance spectra (<sup>13</sup>C NMR) were obtained at 100 MHz on Bruker Nuclear Ascend 400 spectrometers. The chemical shifts are reported in ppm, referenced to the solvent peak of CDCl<sub>3</sub>. High-resolution mass spectra were obtained with a LTQ Orbitrap Discovery mass spectrometer (Thermo Scientific) and these experiments were realized by direct infusion (5 μL/min) in electrospray ionization source using the positive mode. The isotopes simulation were calculated using the Quad Browser v.2.0.7 (Thermo Fisher Scientific Inc.) to compare the elementary composition.

### **General Procedure for the Synthesis of the 2-(aryl)-benzothiazoles**

In a round-bottom flask were added α-phenylglyoxylic acids **1a-d** (0.6 mmol), 2-aminothiophenoles **2a-b** (0.5 mmol), ANO (10 mol%, 0.019 g) and the PEG-400 (1 mL), respectively. The resulting solution was stirred for the time indicated on the Table 2 under conventional heating at 100 °C and under ultrasound irradiation (20 KHz, 60% of ultrasonic amplitude). After that, the reaction mixture was received in water (20 mL), extracted with ethyl acetate (3 x 10 mL), dried over MgSO<sub>4</sub> and concentrated under vacuum. Thus, the residue was purified through chromatography column on silica gel utilizing hexane/ethyl acetate as the eluent.

## General Procedure for the Synthesis of the 3-(aryl)-benzoxazin-2-onas

In a round-bottom flask were added  $\alpha$ -phenylglyoxylic acids **1a-c** (0.6 mmol), 2-aminophenoles **4a-c** (0.5 mmol), ANO (10 mol%, 0.019 g) and the PEG-400 (1 mL), respectively. The resulting mixture was stirred for the time indicated on the Table 3 under conventional heating at 100 °C and under ultrasound irradiation (20 KHz, 60% of ultrasonic amplitude). After that, the reaction mixture was received in water (20 mL), extracted with ethyl acetate (3X 10 mL), dried over MgSO<sub>4</sub> and concentrated under vacuum. Thus, the residue was purified through chromatography column on silica gel utilizing hexane/ethyl acetate as the eluent.

### 2-phenylbenzo[d]thiazole (3aa)

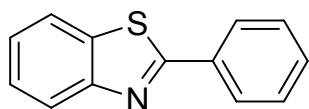

Yield: 0.090 g (85%); Light yellow solid; mp 107-110 °C (Lit.<sup>1</sup>: 109-111 °C). <sup>1</sup>H NMR (CDCl<sub>3</sub>, 400 MHz)  $\delta$  8.11 – 8.07 (m, 3H), 7.91 – 7.89 (m, 1H), 7.51 – 7.47 (m, 4H), 7.39 (ddd,  $J$  = 8.3, 7.3, 1.2 Hz, 1H). <sup>13</sup>C NMR (CDCl<sub>3</sub>, 100 MHz)  $\delta$  168.05, 154.13, 135.05, 133.61, 130.94, 129.00, 127.55, 126.29, 125.17, 123.22, 121.60.

### 5-chloro-2-phenylbenzo[d]thiazole (3ab)

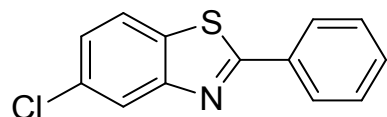

Yield: 0.096 g (77%); Yellow solid; mp 132-134 °C (Lit.<sup>2</sup>: 139 °C). <sup>1</sup>H NMR (CDCl<sub>3</sub>, 400 MHz)  $\delta$  8.05 – 8.03 (m, 3H), 7.75 (d,  $J$  = 8.5 Hz, 1H), 7.48 – 7.46 (m, 3H), 7.32 (dd,  $J$  = 8.5, 2.0 Hz, 1H). <sup>13</sup>C NMR (CDCl<sub>3</sub>, 100 MHz)  $\delta$  169.83, 154.91, 133.24, 133.17, 132.24, 131.26, 129.01, 127.53, 125.56, 122.96, 122.22.

### 2-(4-methoxyphenyl)benzo[d]thiazole (3ba)

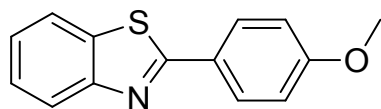

Yield: 0.080 g (66%); White needled solid; mp 114-116 °C (Lit.<sup>3</sup>: 115-116 °C) <sup>1</sup>H NMR (CDCl<sub>3</sub>, 400 MHz) δ 8.03 – 8.00 (m, 3H), 7.86 – 7.84 (m, 1H), 7.45 (ddd, *J* = 8.2, 7.3, 1.2 Hz, 1H), 7.33 (ddd, *J* = 8.2, 7.3, 1.2 Hz, 1H), 6.99 – 6.97 (m, 2H), 3.85 (s, 3H). <sup>13</sup>C NMR (CDCl<sub>3</sub>, 100 MHz) δ 167.78, 161.85, 154.17, 134.80, 129.04, 126.37, 126.13, 124.72, 122.76, 121.44, 114.30, 55.37.

### 5-chloro-2-(4-methoxyphenyl)benzo[d]thiazole (3bb)

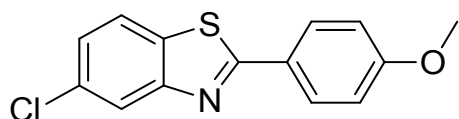

Yield: 0.045 g (30%); White solid: mp 138-140 °C (Lit.<sup>4</sup>: not observed) <sup>1</sup>H NMR (CDCl<sub>3</sub>, 400 MHz) δ 8.01 – 7.98 (m, 3H), 7.75 (d, *J* = 8.5 Hz, 1H), 7.31 (dd, *J* = 8.5, 2.0 Hz, 1H), 7.00 – 6.97 (m, 2H), 3.87 (s, 3H). <sup>13</sup>C NMR (CDCl<sub>3</sub>, 100 MHz) δ 169.65, 162.18, 155.07, 133.08, 132.13, 129.17, 126.02, 125.14, 122.59, 122.12, 114.40, 55.45.

### 2-(4-bromophenyl)benzo[d]thiazole (3ca)

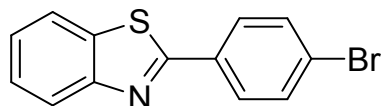

Yield: 0.09 g (63%); White solid: mp 124-126 °C (Lit.<sup>5</sup>: 127-129 °C). <sup>1</sup>H NMR (CDCl<sub>3</sub>, 400 MHz) δ 8.05 (d, *J* = 8.1 Hz, 1H), 7.92 (d, *J* = 8.2 Hz, 2H), 7.87 (d, *J* = 7.8 Hz, 1H), 7.59 (d, *J* = 8.2 Hz, 2H), 7.48 (t, *J* = 7.7 Hz, 1H), 7.38 (t, *J* = 7.7 Hz, 1H). <sup>13</sup>C NMR (CDCl<sub>3</sub>, 100 MHz) δ 166.62, 154.02, 134.99, 132.49, 132.17, 128.85, 126.45, 125.40, 125.37, 123.28, 121.61.

### 2-(4-bromophenyl)-5-chlorobenzo[d]thiazole (3cb)

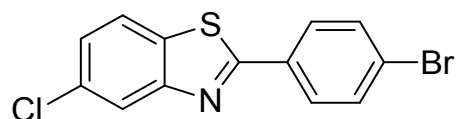

Yield: 0.096 g (60%); Light green solid: mp 140-143 °C (Lit.<sup>4</sup>: not observed). <sup>1</sup>H NMR (CDCl<sub>3</sub>, 400 MHz) δ 8.05 (d, *J* = 2.0 Hz, 1H), 7.96 – 7.92 (m, 2H), 7.81 (d, *J* = 8.5 Hz, 1H), 7.65 – 7.62 (m, 2H), 7.38 (dd, *J* = 8.5, 2.0 Hz, 1H). <sup>13</sup>C NMR (CDCl<sub>3</sub>, 100 MHz) δ 168.53, 154.91, 133.27, 132.53, 132.32, 132.18, 128.93, 125.92, 125.86, 123.12, 122.34.

### 2-(4-fluorophenyl)benzo[d]thiazole (3da)

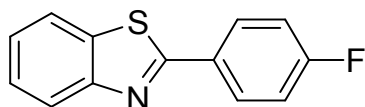

Yield: 0.076 g (67%); White solid: mp 98-100 °C (Lit.<sup>6</sup>: 98-100 °C). <sup>1</sup>H NMR (CDCl<sub>3</sub>, 400 MHz) δ 8.09 – 8.04 (m, 3H), 7.88 (d, *J* = 8.0 Hz, 1H), 7.48 (ddd, *J* = 8.3, 7.2, 1.2 Hz, 1H), 7.37 (td, *J* = 8.3, 7.2, 1.2 Hz, 1H), 7.21 – 7.13 (m, 1H). <sup>13</sup>C NMR (CDCl<sub>3</sub>, 100 MHz) δ 166.67, 164.41 (d, *J* = 251.9 Hz), 154.05, 135.01, 129.92 (d, *J* = 3.3 Hz), 129.47 (d, *J* = 8.5 Hz), 126.36, 125.19, 123.15, 121.56, 116.10 (d, *J* = 22.2 Hz).

### 3-phenyl-2H-benzo[b][1,4]oxazin-2-one (5aa)

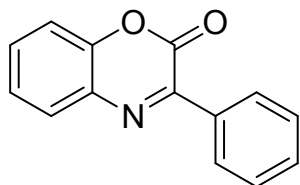

Yield: 0.095 g (80%); Beige solid: mp: 118-119 °C (Lit.<sup>7</sup>: 121-122 °C) <sup>1</sup>H NMR (CDCl<sub>3</sub>, 400 MHz) δ 8.33 (dd, *J* = 8.1, 1.5 Hz, 2H), 7.84 (d, *J* = 7.9 Hz, 1H), 7.53 – 7.49 (m, 4H), 7.38 (t, *J* = 8.1 Hz, 1H), 7.32 (d, *J* = 8.1 Hz, 1H). <sup>13</sup>C NMR (CDCl<sub>3</sub>, 100 MHz) δ 152.14,

150.69, 146.37, 134.04, 131.55, 131.33, 131.02, 129.37, 129.36, 128.29, 125.46, 116.07.

### 6-methyl-3-phenyl-2H-benzo[b][1,4]oxazin-2-one (5ab)

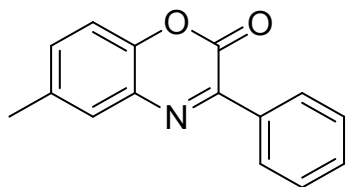

Yield: 0.1035 g (87%); Yellow needled solid: mp 126-128 °C (Lit.<sup>8</sup>: 130-132 °C). <sup>1</sup>H NMR (CDCl<sub>3</sub>, 400 MHz) δ 8.32-3.29 (m, 2H), 7.59 (s, 1H), 7.52 – 7.44 (m, 3H), 7.27 (d, *J* = 8.4 Hz, 1H), 7.16 (dd, *J* = 8.4, 2.1 Hz, 1H), 2.41 (s, 3H). <sup>13</sup>C NMR (CDCl<sub>3</sub>, 100 MHz) δ 152.32, 150.44, 144.28, 135.35, 134.14, 131.97, 131.24, 131.18, 129.32, 129.15, 128.22, 115.59, 20.72.

### 6-chloro-3-phenyl-2H-benzo[b][1,4]oxazin-2-one (5ac)

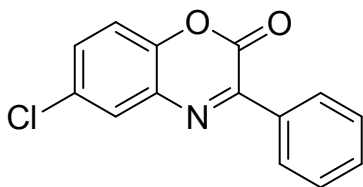

Yield: 0.0895 g (70%); Orange needled solid: mp 139-141 °C (Lit.<sup>8</sup>: 138-139 °C). <sup>1</sup>H NMR (CDCl<sub>3</sub>, 400 MHz) δ 8.36 – 8.33 (m, 2H), 7.85 (d, *J* = 2.5 Hz, 1H), 7.57 – 7.46 (m, 4H), 7.26 (d, *J* = 3.6 Hz, 1H). <sup>13</sup>C NMR (CDCl<sub>3</sub>, 100 MHz) δ 151.77, 151.67, 145.02, 133.70, 132.14, 131.87, 130.96, 130.67, 129.58, 128.83, 128.45, 117.27.

### 3-(4-methoxyphenyl)-2H-benzo[b][1,4]oxazin-2-one (5ba)

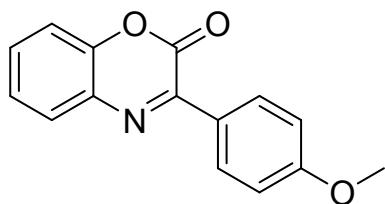

Yield: 0.082 g (75%); Light yellow needled solid: mp 132-134 °C (Lit.<sup>8</sup>: 131-132 °C). <sup>1</sup>H NMR (CDCl<sub>3</sub>, 400 MHz) δ 8.42 – 8.39 (m, 2H), 7.82 (dd, *J* = 7.9, 1.6 Hz, 1H), 7.48 (ddd, *J* = 8.2, 7.4, 1.6 Hz, 1H), 7.37 (td, *J* = 7.9, 1.4 Hz, 1H), 7.32 (dd, *J* = 8.2, 1.3 Hz, 1H), 7.03 – 6.99 (m, 2H), 3.89 (s, 3H). <sup>13</sup>C NMR (CDCl<sub>3</sub>, 100 MHz) δ 162.38, 152.47, 149.89, 146.29, 131.78, 131.38, 130.43, 129.08, 126.82, 125.46, 116.06, 113.82, 55.44.

### 3-(4-methoxyphenyl)-6-methyl-2H-benzo[b][1,4]oxazin-2-one (5bb)

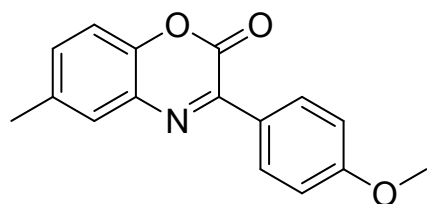

Yield: 0.115 g (86%); Dark yellow solid: mp 135-138 °C. <sup>1</sup>H NMR (CDCl<sub>3</sub>, 400 MHz) δ 8.41 – 8.37 (m, 1H), 7.61 (m, 1H), 7.28 (dd, *J* = 8.4, 2.0 Hz, 1H), 7.20 (d, *J* = 8.4 Hz, 1H), 7.02 – 6.98 (m, 2H), 3.89 (s, 3H), 2.45 (s, 3H). <sup>13</sup>C NMR (CDCl<sub>3</sub>, 100 MHz) δ 162.27, 152.70, 149.75, 144.24, 135.34, 131.50, 131.41, 131.32, 128.94, 126.95, 115.61, 113.78, 55.42, 20.85.

### 6-chloro-3-(4-methoxyphenyl)-2H-benzo[b][1,4]oxazin-2-one (5bc)

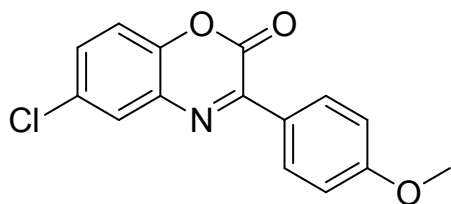

Yield: 0.100 g (70%); Yellow needled solid; mp 160-162 °C.  $^1\text{H}$  NMR ( $\text{CDCl}_3$ , 400 MHz)  $\delta$  8.43 – 8.39 (m, 2H), 7.80 (d,  $J$  = 2.4 Hz, 1H), 7.42 (dd,  $J$  = 8.8, 2.4 Hz, 1H), 7.24 (d,  $J$  = 8.8 Hz, 1H), 7.01 – 6.98 (m, 2H), 3.89 (s, 3H).  $^{13}\text{C}$  NMR ( $\text{CDCl}_3$ , 100 MHz)  $\delta$  162.75, 151.85, 150.64, 144.80, 132.28, 131.60, 130.52, 130.19, 128.43, 126.36, 117.10, 113.89, 55.45. HRMS calcd. for  $\text{C}_{15}\text{H}_{10}\text{ClNO}_3$   $[\text{M}+\text{H}]^+$  287.0349. Found: 287.0338.

### 3-(4-bromophenyl)-2H-benzo[b][1,4]oxazin-2-one (5ca)

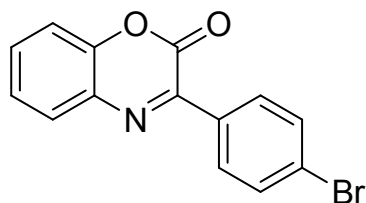

Yield: 0.1132 g (75%); Light yellow solid; mp 133-135 °C (Lit.<sup>8</sup>: 134-135).  $^1\text{H}$  NMR ( $\text{CDCl}_3$ , 400 MHz)  $\delta$  8.29 – 8.25 (m, 2H), 7.84 (dd,  $J$  = 7.9, 1.5 Hz, 1H), 7.65 – 7.60 (m, 2H), 7.53 (ddd,  $J$  = 8.2, 1.5 Hz, 1H), 7.40 (ddd,  $J$  = 7.9, 1.2 Hz, 1H), 7.34 (dd,  $J$  = 8.2, 1.2 Hz, 1H).  $^{13}\text{C}$  NMR ( $\text{CDCl}_3$ , 100 MHz)  $\delta$  152.08, 149.57, 146.45, 132.90, 131.63, 131.53, 131.42, 130.98, 129.48, 126.46, 125.69, 116.21.

### 3-(4-bromophenyl)-6-methyl-2H-benzo[b][1,4]oxazin-2-one (5cb)

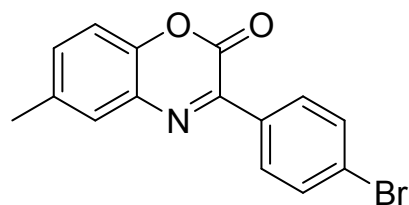

Yield: 0.150 g (93%); Yellow solid; mp 129-131 °C.  $^1\text{H}$  NMR ( $\text{CDCl}_3$ , 400 MHz)  $\delta$  8.27 – 8.23 (m, 2H), 7.62 – 7.59 (m, 3H), 7.32 (dd,  $J$  = 8.4, 2.1 Hz, 1H), 7.21 (d,  $J$  = 8.4 Hz, 1H), 2.45 (s, 3H).  $^{13}\text{C}$  NMR ( $\text{CDCl}_3$ , 100 MHz)  $\delta$  152.29, 149.35, 144.38, 135.63, 133.02, 132.40, 131.56, 131.24, 130.92, 129.27, 126.29, 115.74, 20.82. HRMS calcd. for  $\text{C}_{15}\text{H}_{10}\text{BrNO}_2$   $[\text{M}+\text{H}]^+$  314.9895. Found: 314.9891.



### 3-(4-bromophenyl)-6-chloro-2H-benzo[b][1,4]oxazin-2-one (5cc)

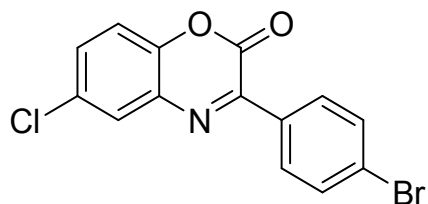

Yield: 0.111 g (66%); Orange needled solid: 153-155 °C.  $^1\text{H}$  NMR ( $\text{CDCl}_3$ , 400 MHz)  $\delta$  8.27 – 8.25 (m, 2H), 7.84 (d,  $J = 2.4$  Hz, 1H), 7.64 – 7.62 (m, 2H), 7.48 (dd,  $J = 8.8, 2.4$  Hz, 1H), 7.28 (d,  $J = 8.8$  Hz, 1H).  $^{13}\text{C}$  NMR ( $\text{CDCl}_3$ , 100 MHz)  $\delta$  151.48, 150.52, 144.98, 132.46, 131.99, 131.73, 131.25, 131.08, 130.84, 128.84, 127.04, 117.31. HRMS calcd. for  $\text{C}_{14}\text{H}_7\text{BrClNO}_2$   $[\text{M}+\text{H}]^+$  334.9349. Found: 334.9339

## References

- [1] M. Okimoto, T. Yoshida, M. Hoshi, K. Hattori, M. Komata, K. Tomozawa and T. Chiba, *Heterocycles* 2008, **75**, 35.
- [2] S. Kamila, H. Zhang and E. R. Biehl, *Heterocycles* 2005, **65**, 2119.
- [3] (a) A. M. Youssed, H. M. Mohamed, C. Czezowski, A. Ata and A.S. Abd-El-Aziz, *Heterocycles* 2006, **68**, 347; (b) H. Hachiya, K. Hirano, T. Satoh and M. Miura, *Org. Lett.*, 2009, **11**, 1737.
- [4] X. Fan, Y. Wang, Y. He, X. Zhang and J. Wang, *Tetrahedron Lett.*, 2010, **51**, 3493.
- [5] A. A. Weekes, M. C. Dix, M. C. Bagley and A. D. Westwell, *Synth. Commun.*, 2010, **40**, 30127.
- [6] K. Bahrami, M. M. Khodaei and A. Nejati, *Green Chem.*, 2010, **12**, 1237.
- [7] M. Hideto, Y. Yousuke and T. Yoshiji, *J. Org. Chem.*, 2006, **71**, 2099.
- [8] S. Yan, L. Ye, M. Liu, J. Chen, J. Ding, W. Gao, X. Huang and H. Wu, *RSC Adv.*, 2014, **4**, 16705.

# SELECTED SPECTRA

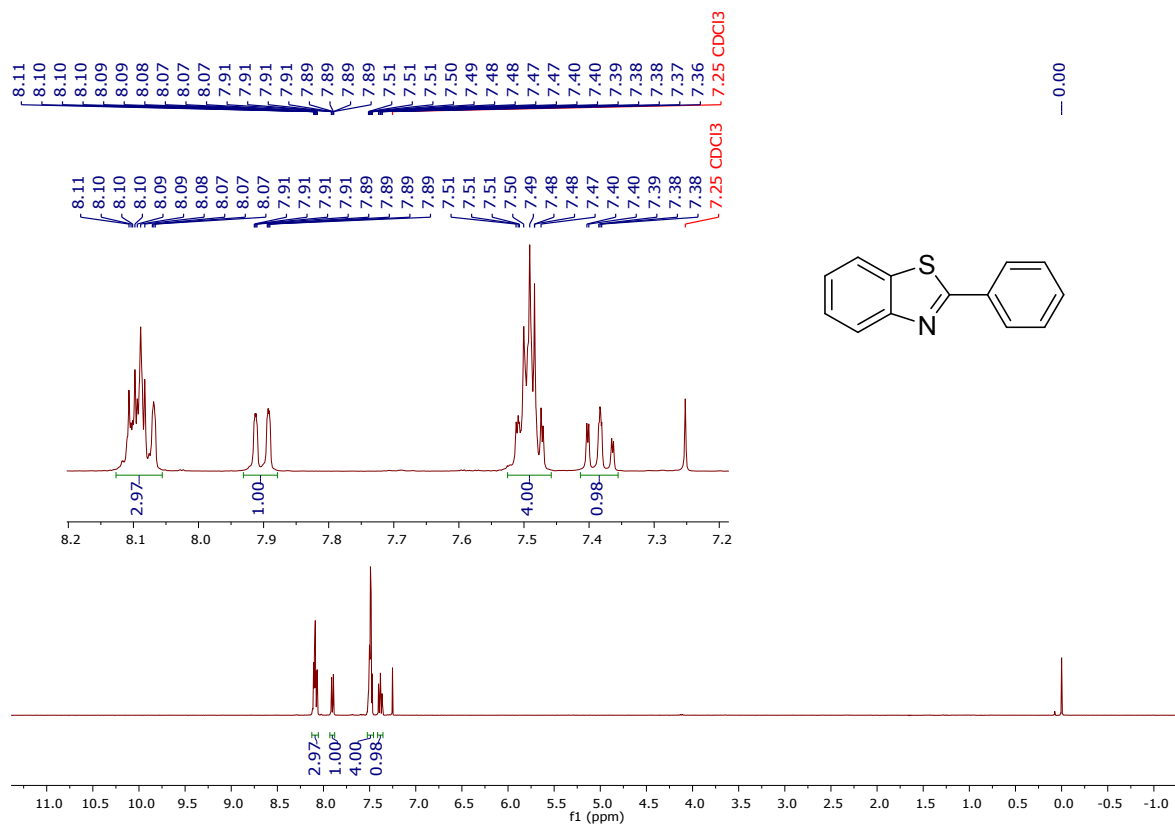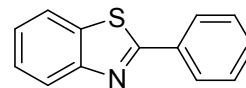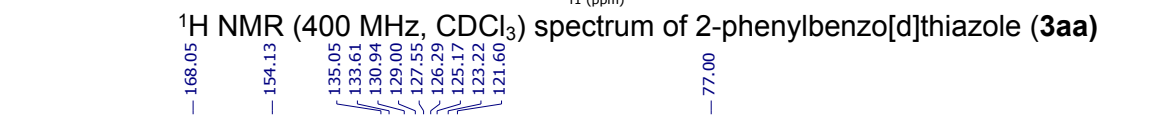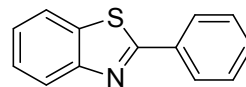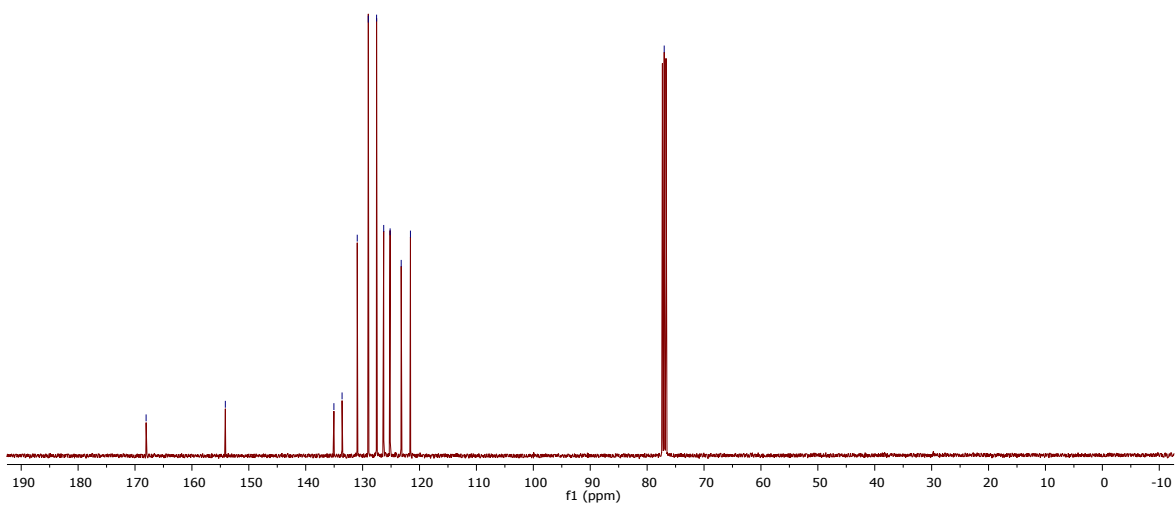

<sup>13</sup>C NMR (100 MHz, CDCl<sub>3</sub>) spectrum of 2-phenylbenzo[d]thiazole (**3aa**)

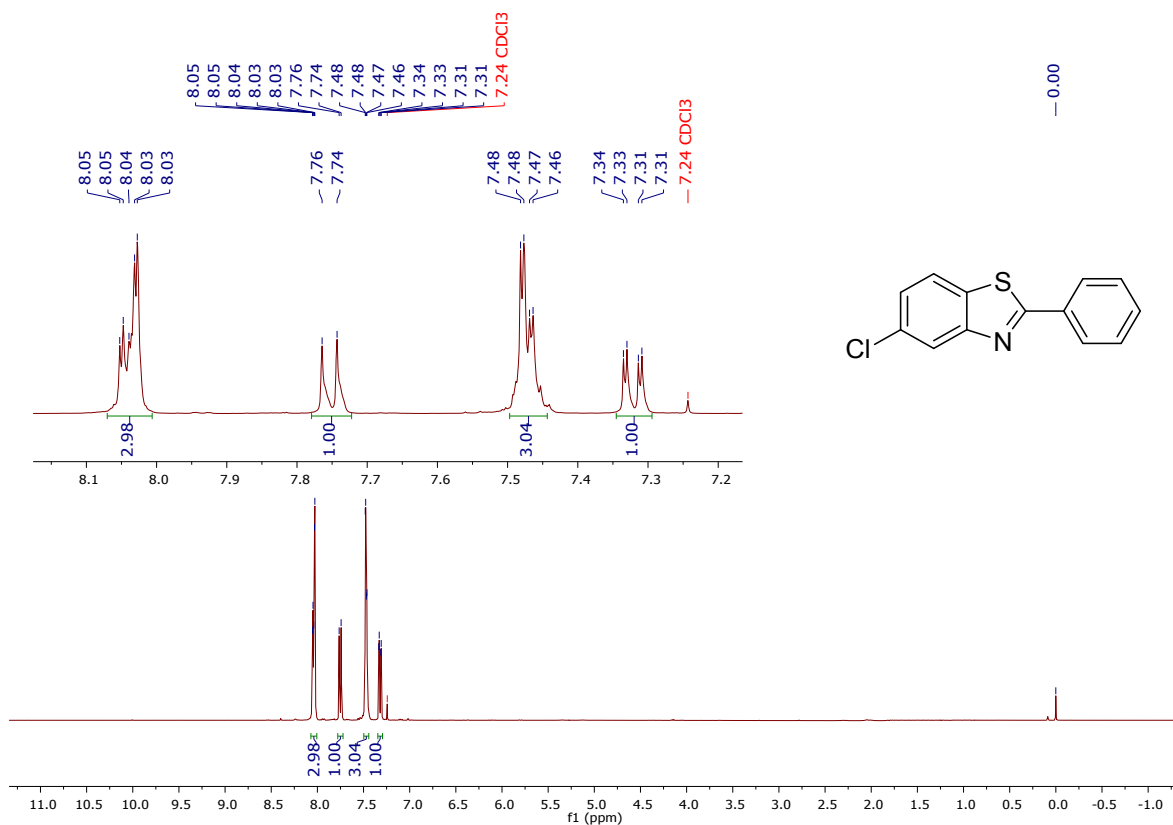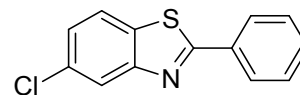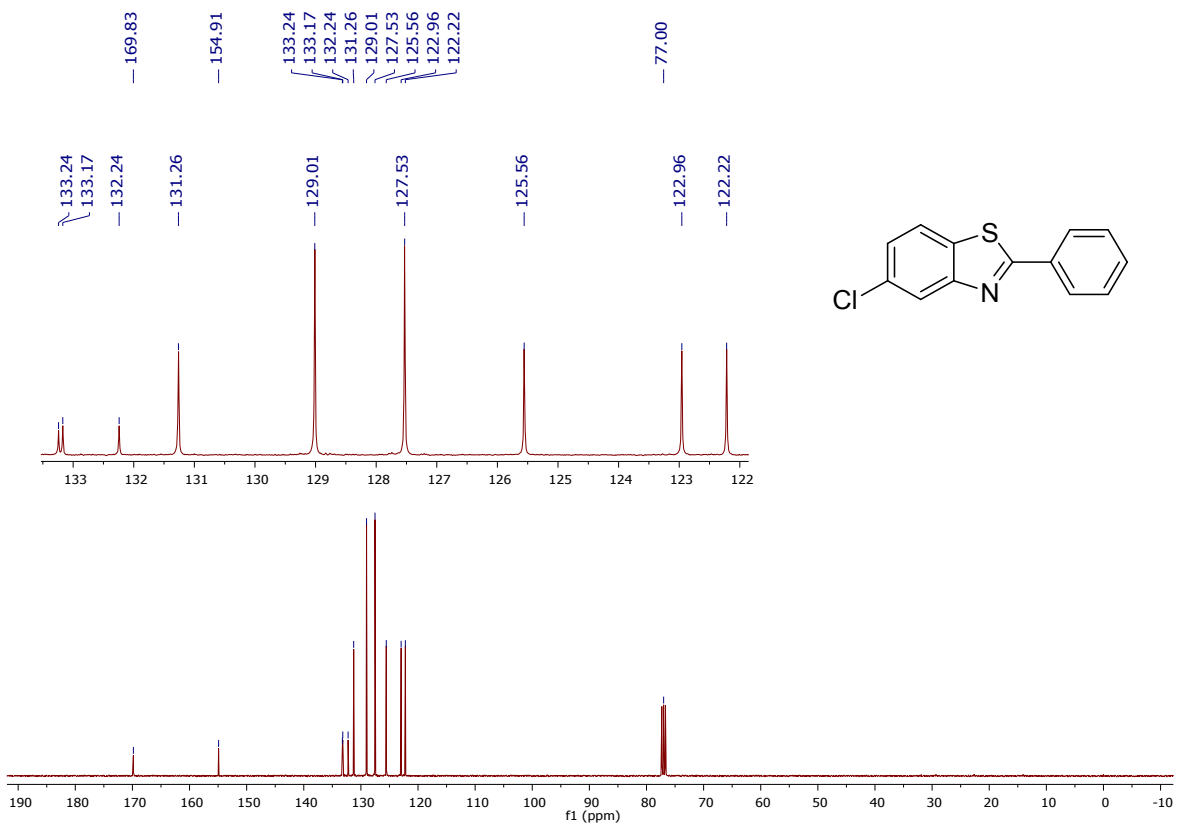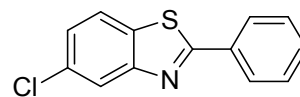



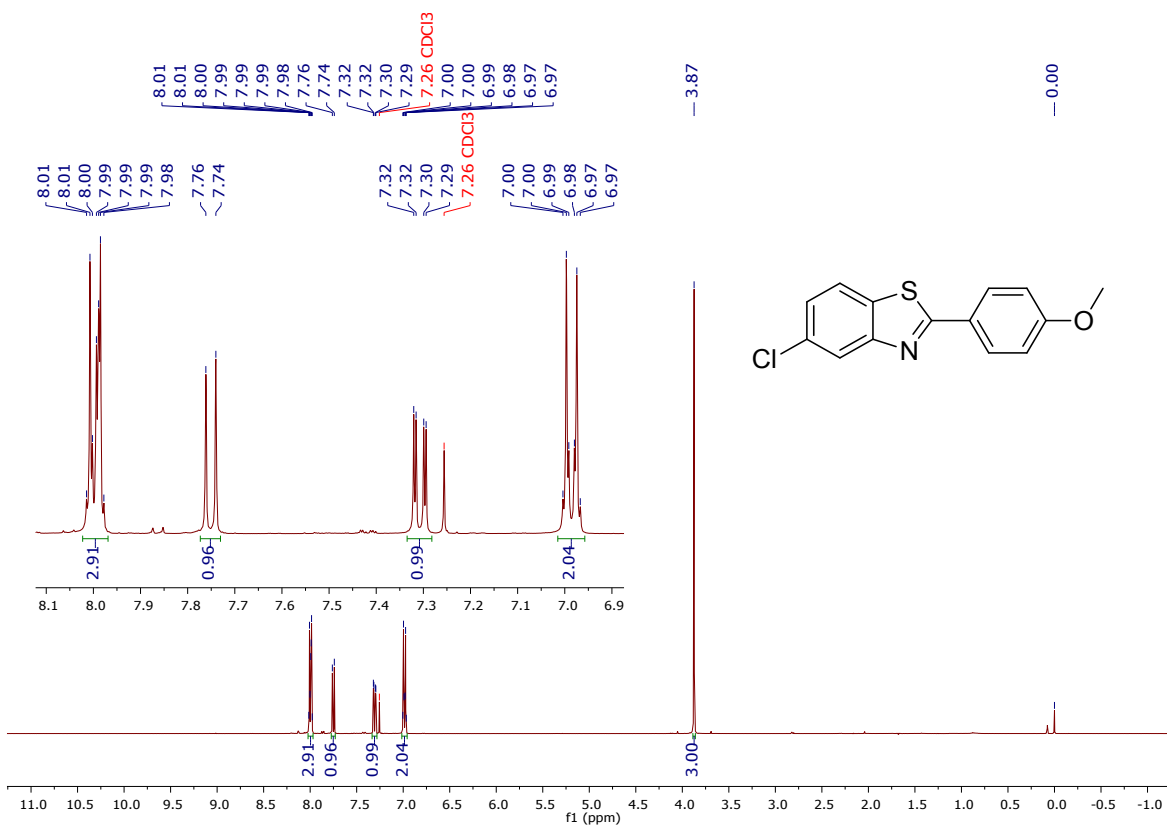

**<sup>1</sup>H NMR (400 MHz, CDCl<sub>3</sub>) spectrum of 5-chloro-2-(4-methoxyphenyl)benzo[d]thiazole (**3bb**)**

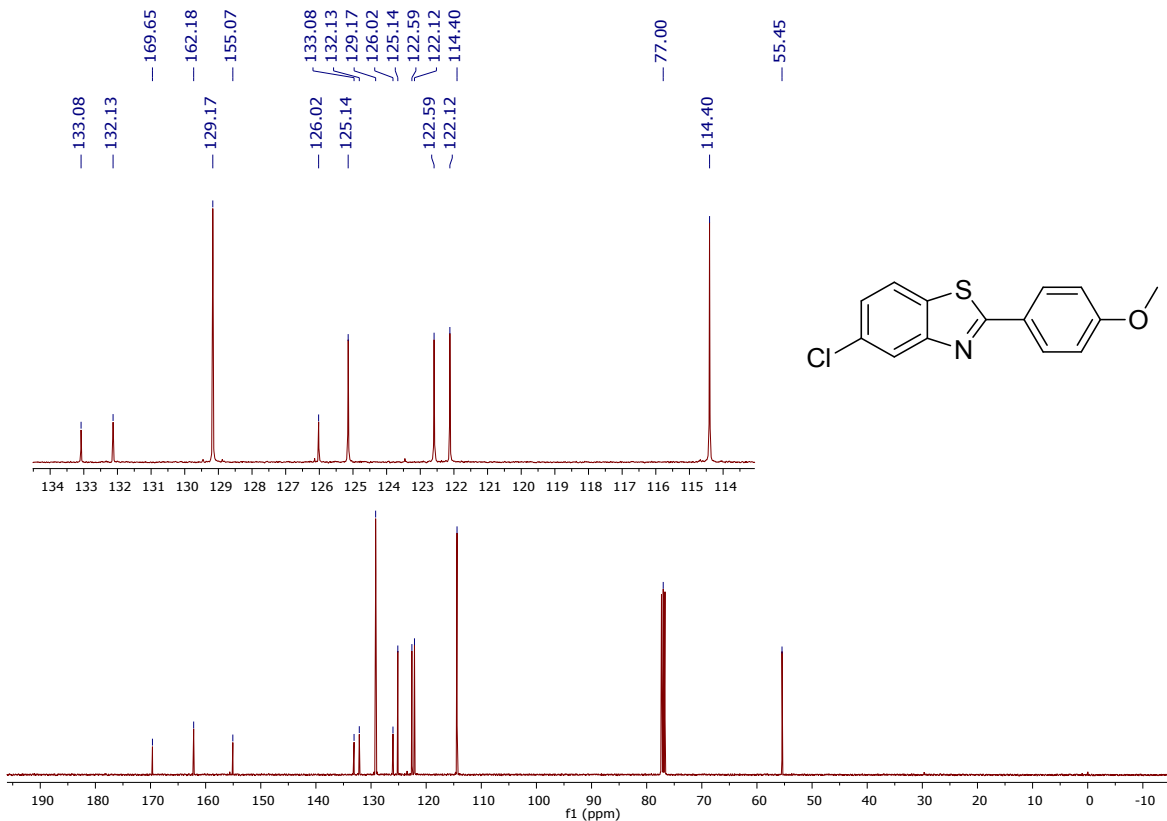

**<sup>13</sup>C NMR (100 MHz, CDCl<sub>3</sub>) spectrum of 5-chloro-2-(4-methoxyphenyl)benzo[d]thiazole (**3bb**)**

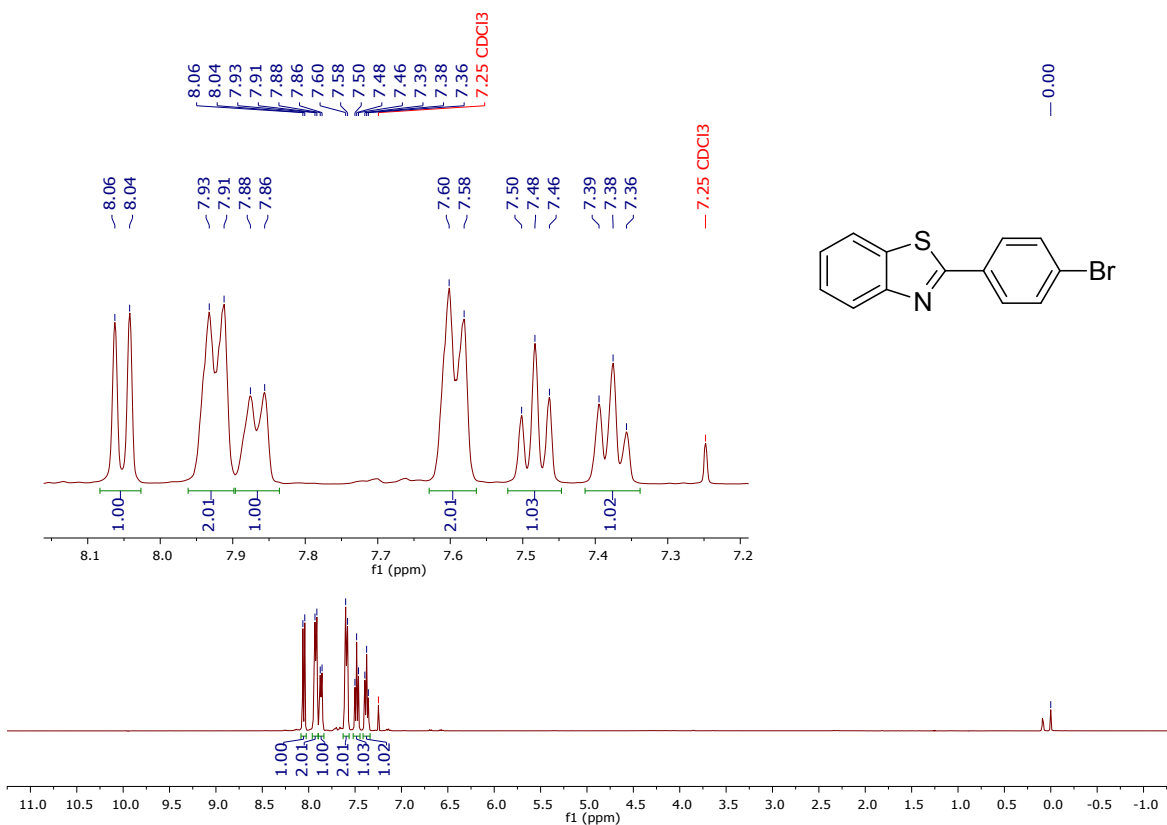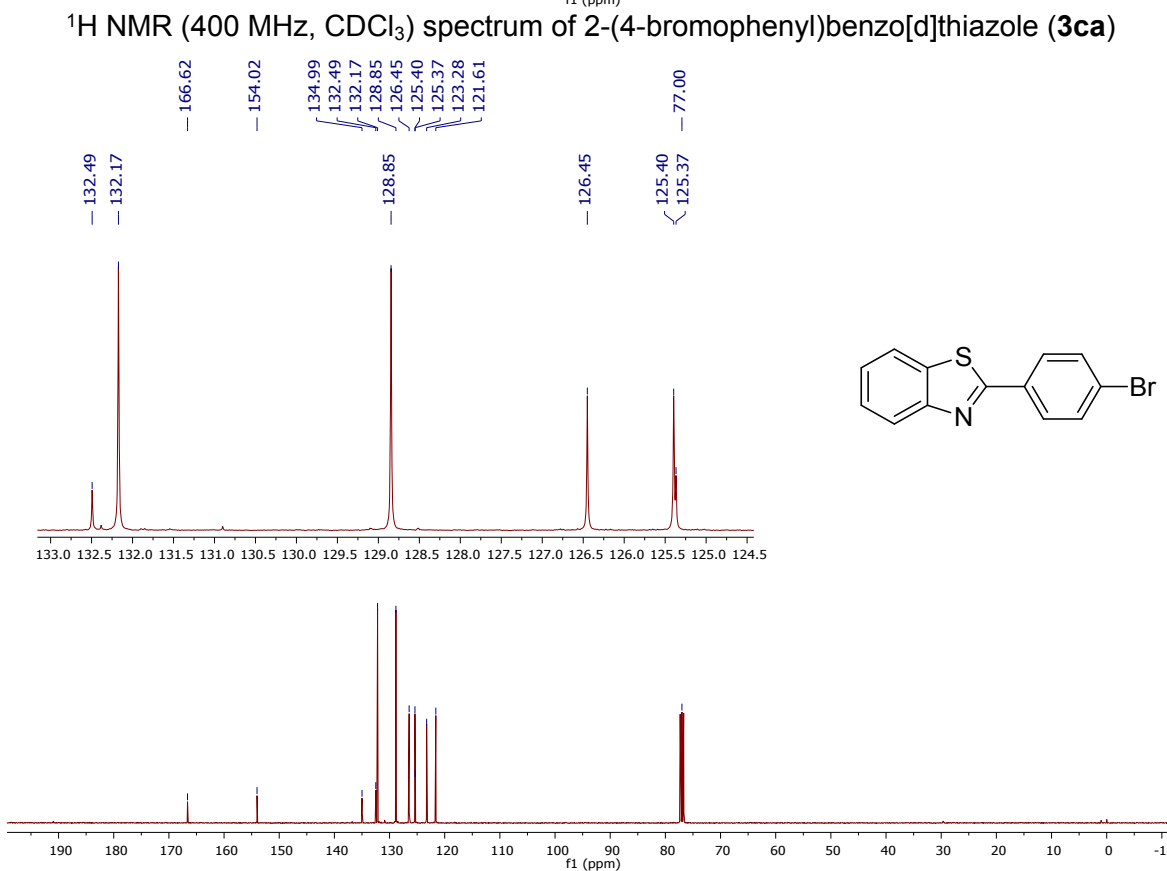

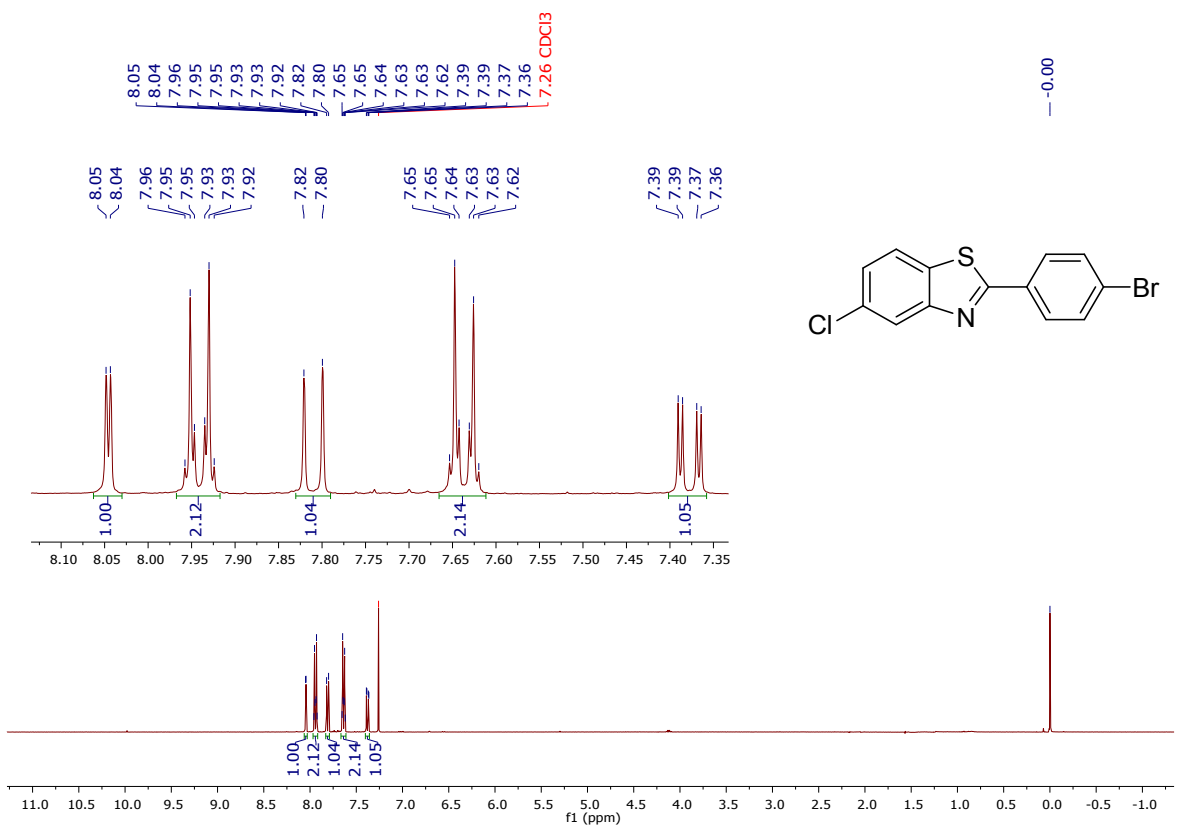

**<sup>1</sup>H NMR (400 MHz, CDCl<sub>3</sub>) spectrum of 2-(4-bromophenyl)-5-chlorobenzothiazole (**3cb**)**

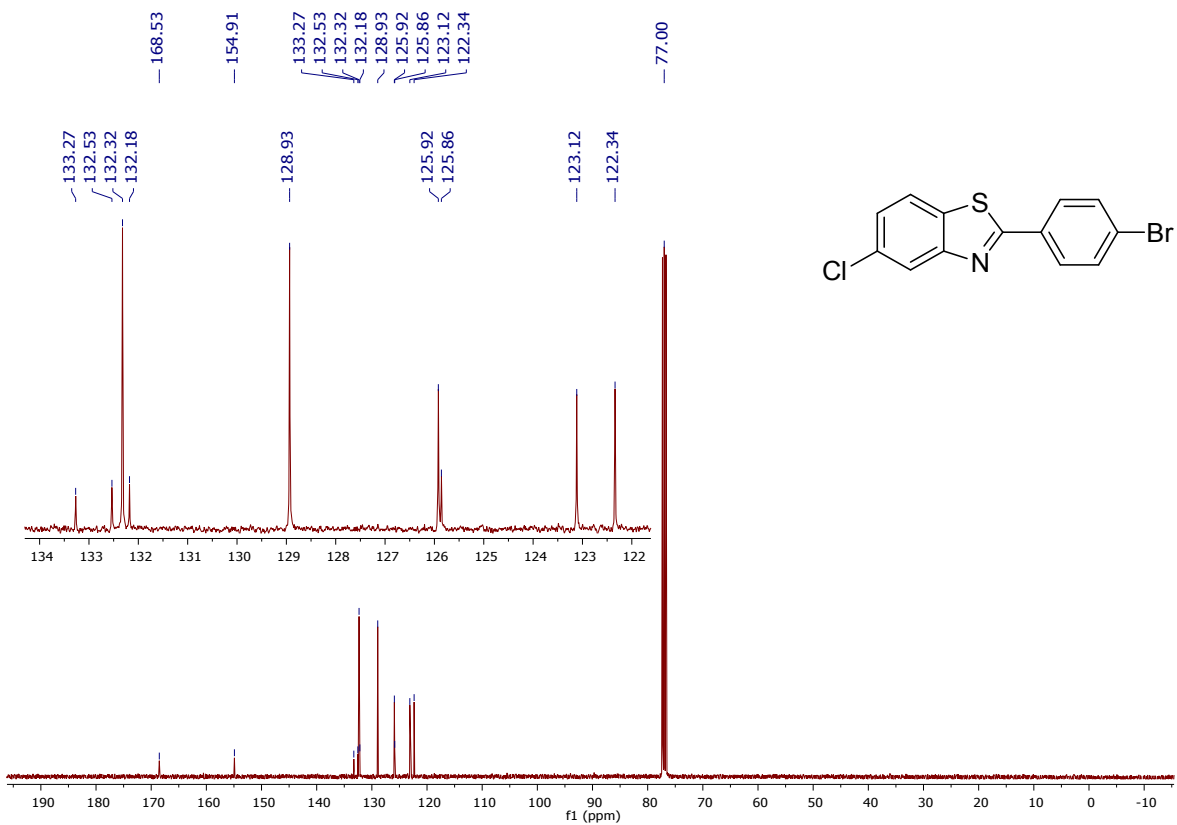

**<sup>13</sup>C NMR (100 MHz, CDCl<sub>3</sub>) spectrum of 2-(4-bromophenyl)-5-chlorobenzothiazole (**3cb**)**





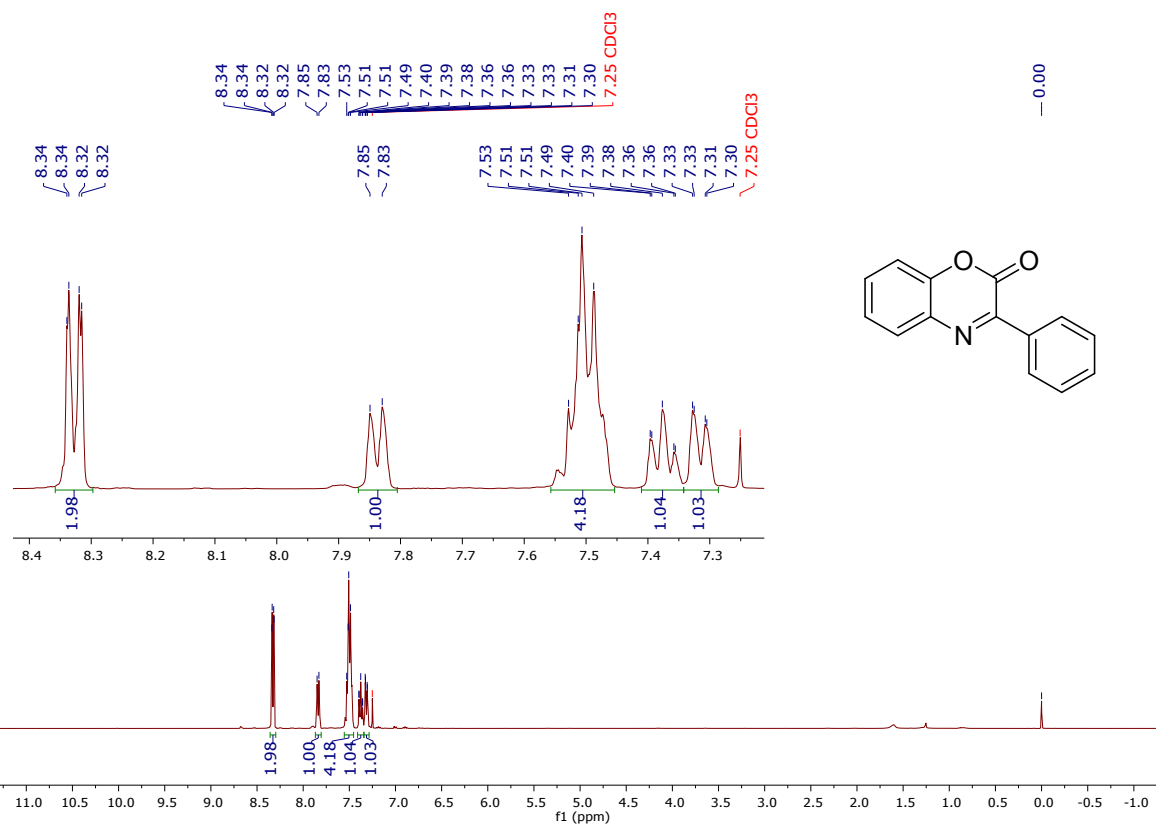

**<sup>1</sup>H NMR (400 MHz, CDCl<sub>3</sub>) spectrum of 3-phenyl-2*H*-benzo[*b*][1,4]oxazin-2-one (5aa)**

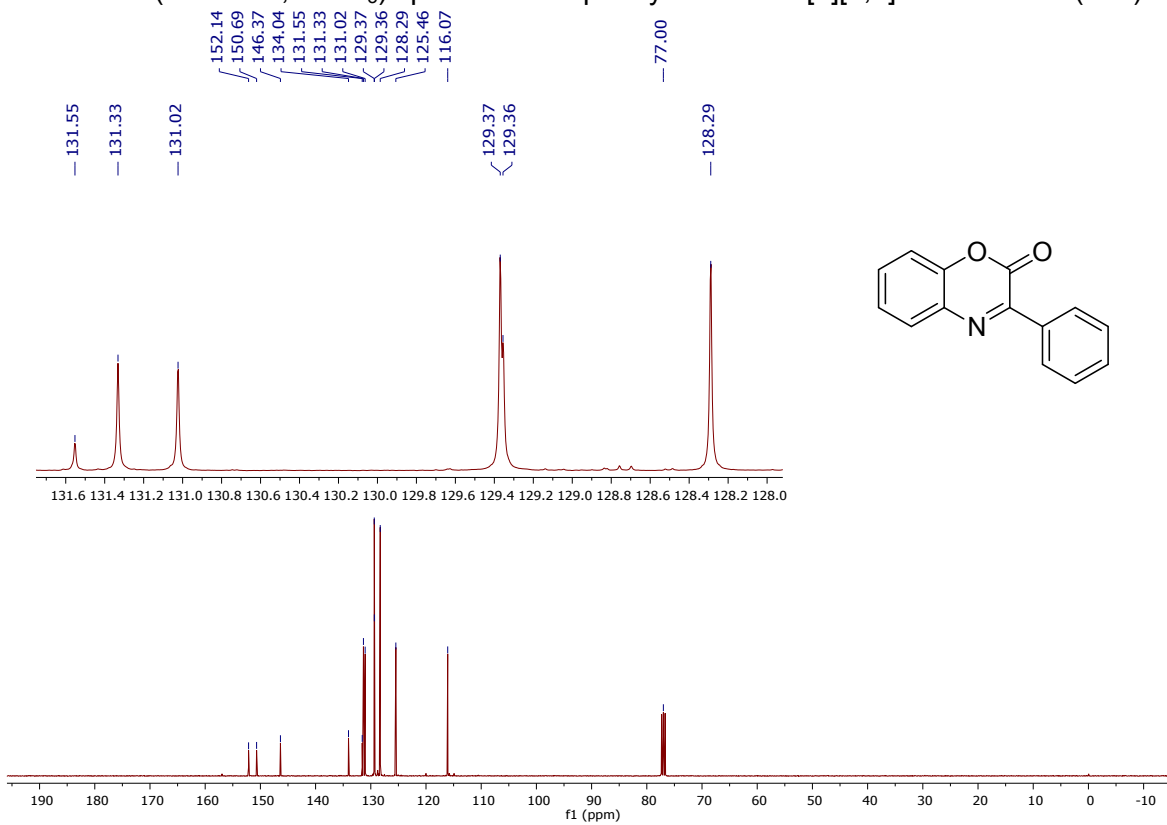

**<sup>13</sup>C NMR (100 MHz, CDCl<sub>3</sub>) spectrum of 3-phenyl-2*H*-benzo[*b*][1,4]oxazin-2-one (5aa)**

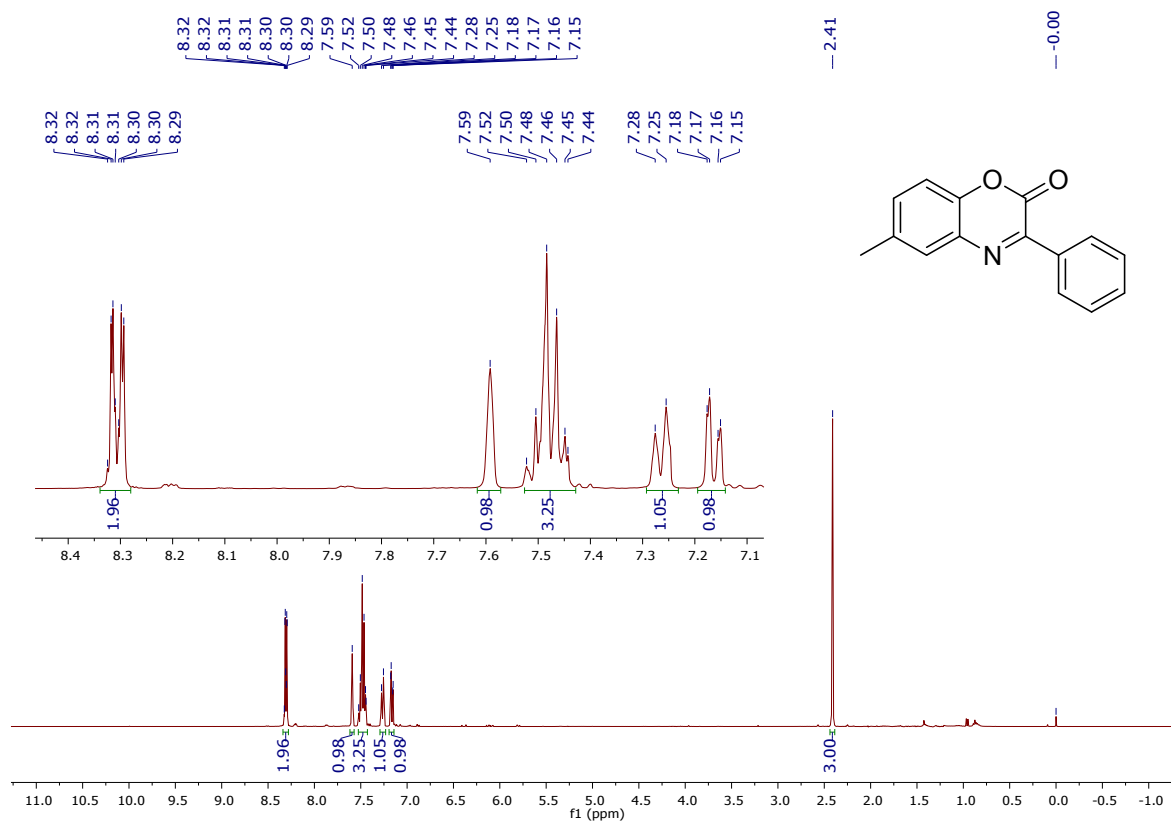

**<sup>1</sup>H NMR (400 MHz, CDCl<sub>3</sub>) spectrum of 6-methyl-3-phenyl-2H-benzo[*b*][1,4]oxazin-2-one (**5ab**)**

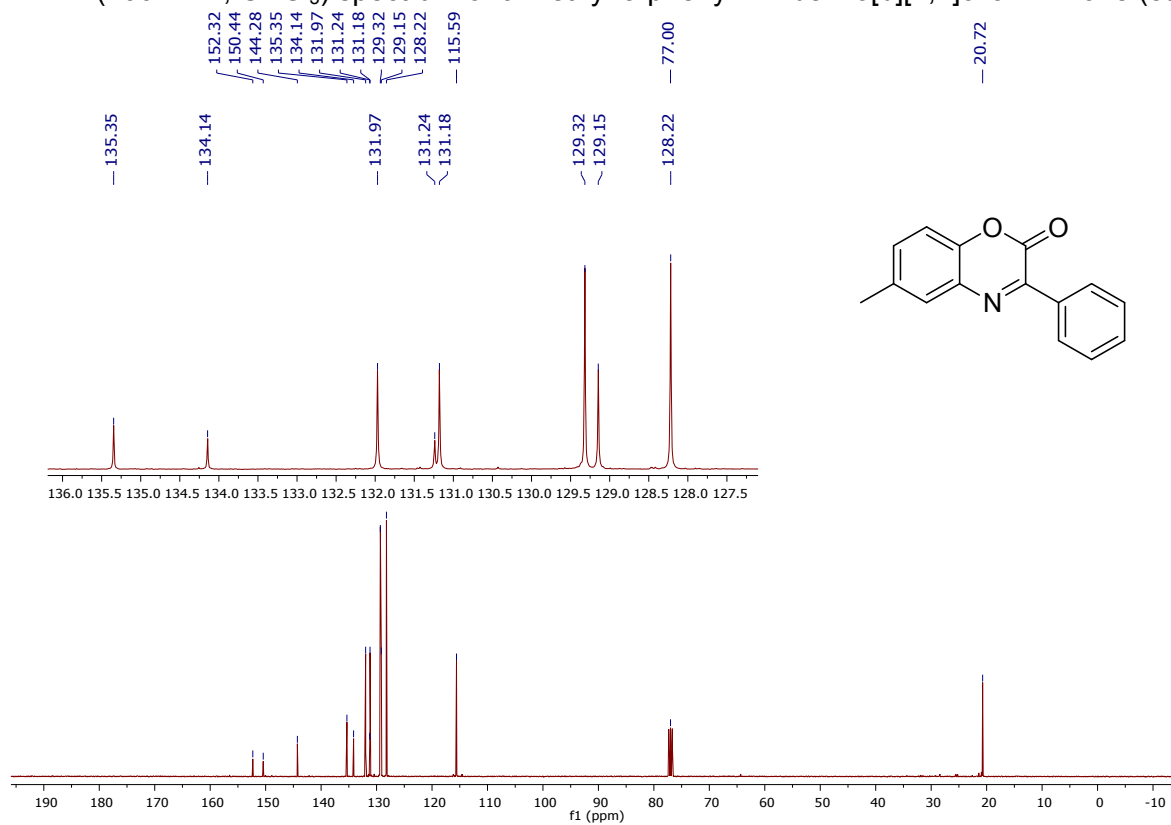

**<sup>13</sup>C NMR (100 MHz, CDCl<sub>3</sub>) spectrum of 6-methyl-3-phenyl-2H-benzo[*b*][1,4]oxazin-2-one (**5ab**)**

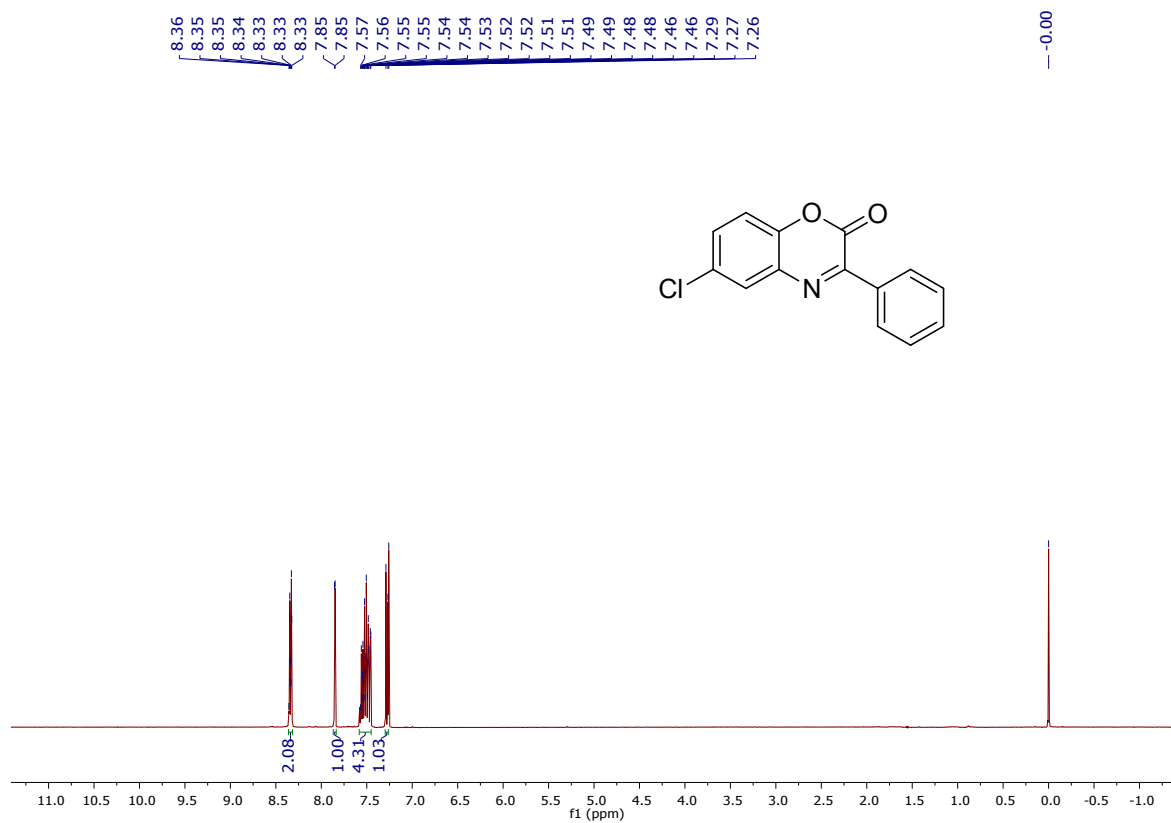

$^1\text{H}$  NMR (400 MHz,  $\text{CDCl}_3$ ) spectrum of 6-chloro-3-phenyl-2H-benzo[b][1,4]oxazin-2-one (**5ac**)

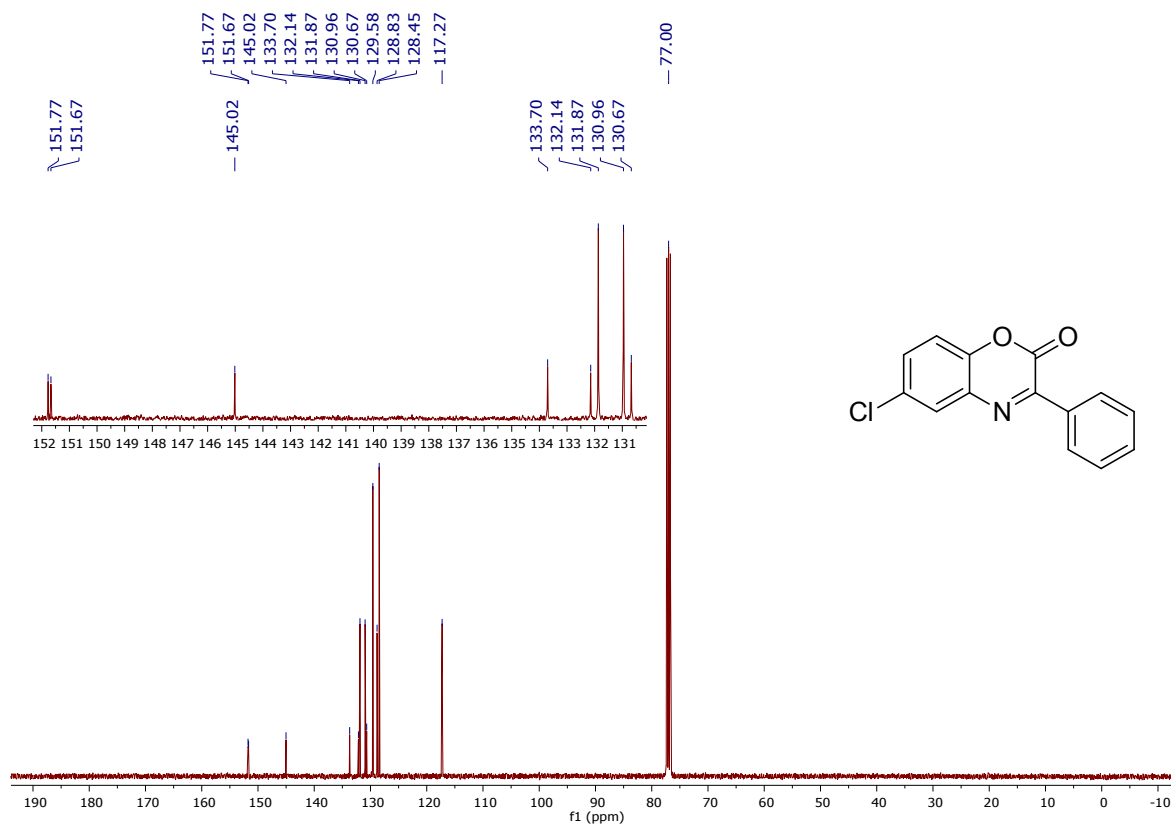

$^{13}\text{C}$  NMR (100 MHz,  $\text{CDCl}_3$ ) spectrum of 6-chloro-3-phenyl-2H-benzo[b][1,4]oxazin-2-one (**5ac**)

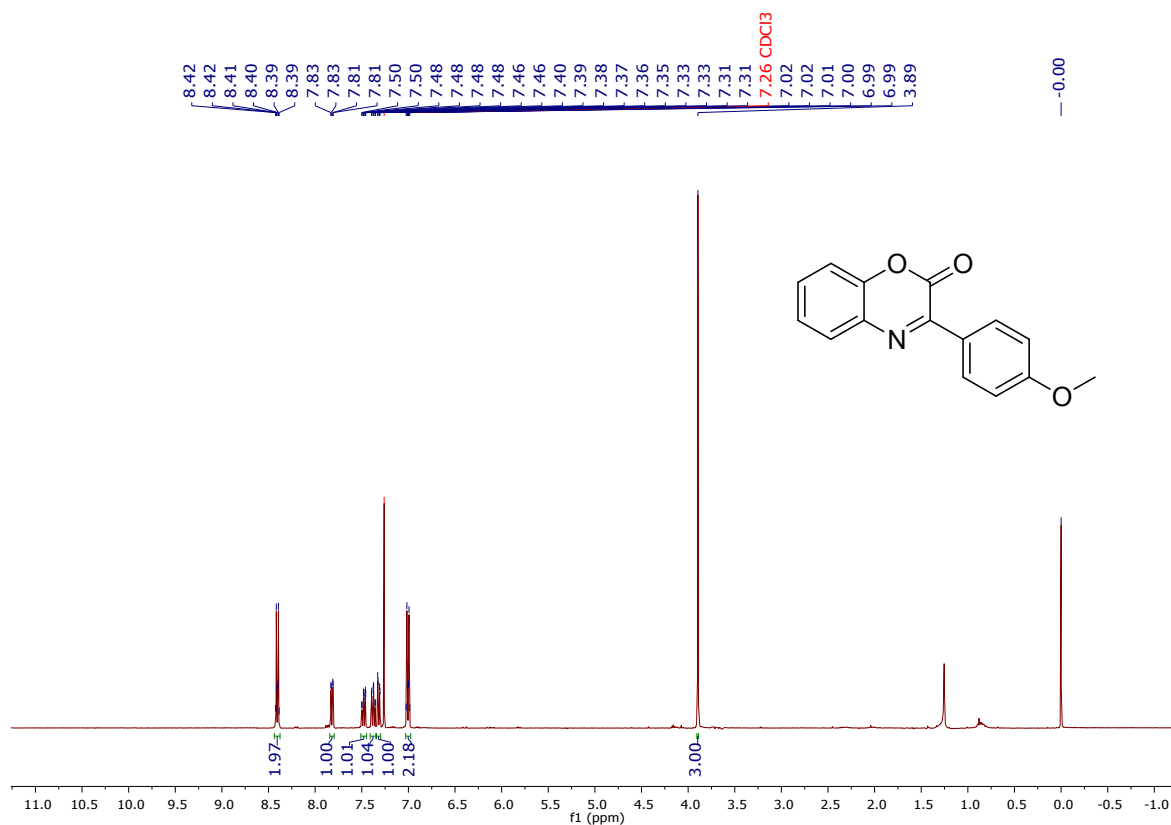

<sup>1</sup>H NMR (400 MHz, CDCl<sub>3</sub>) spectrum of 3-(4-methoxyphenyl)-2H-benzo[b][1,4]oxazin-2-one (5ba)

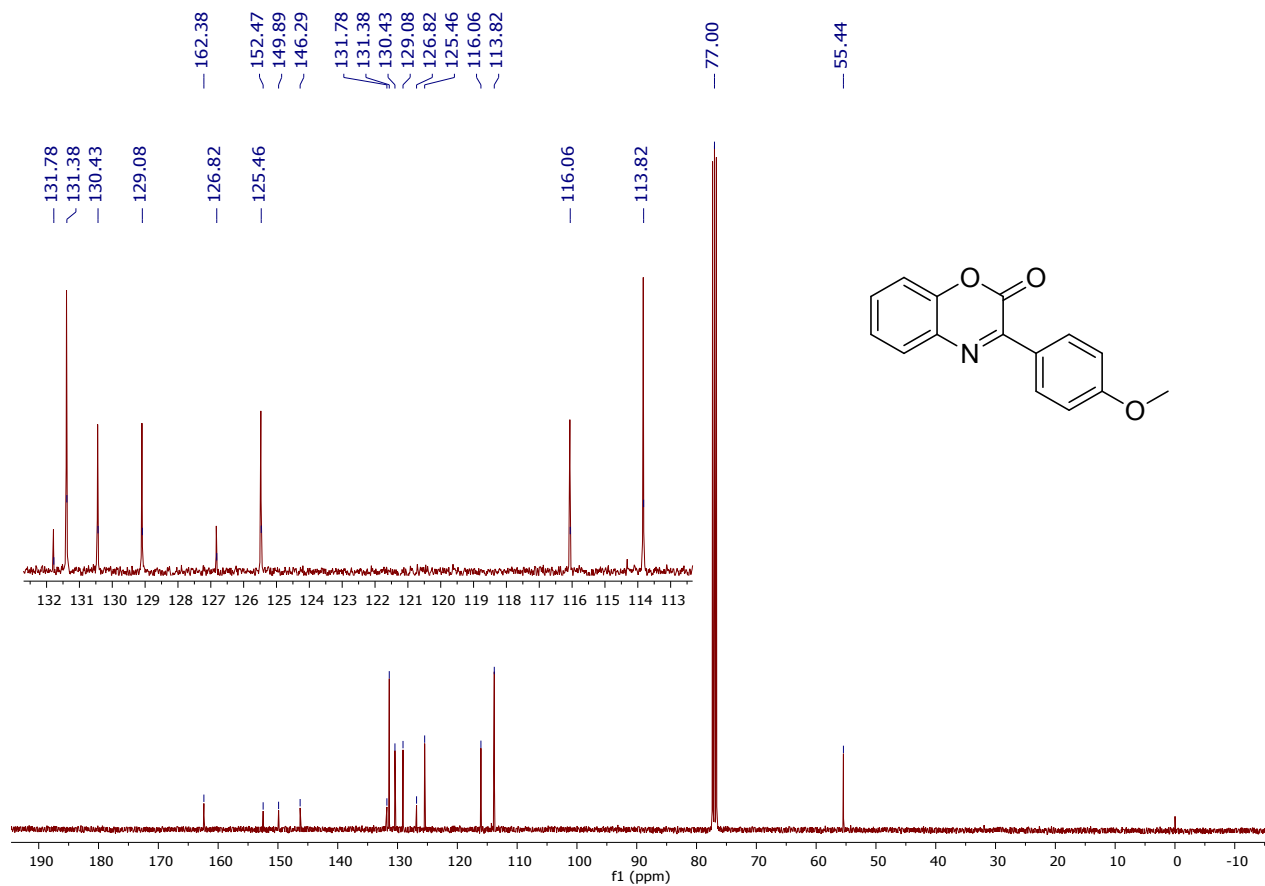

<sup>13</sup>C NMR (100 MHz, CDCl<sub>3</sub>) spectrum of 3-(4-methoxyphenyl)-2H-benzo[b][1,4]oxazin-2-one (5ba)

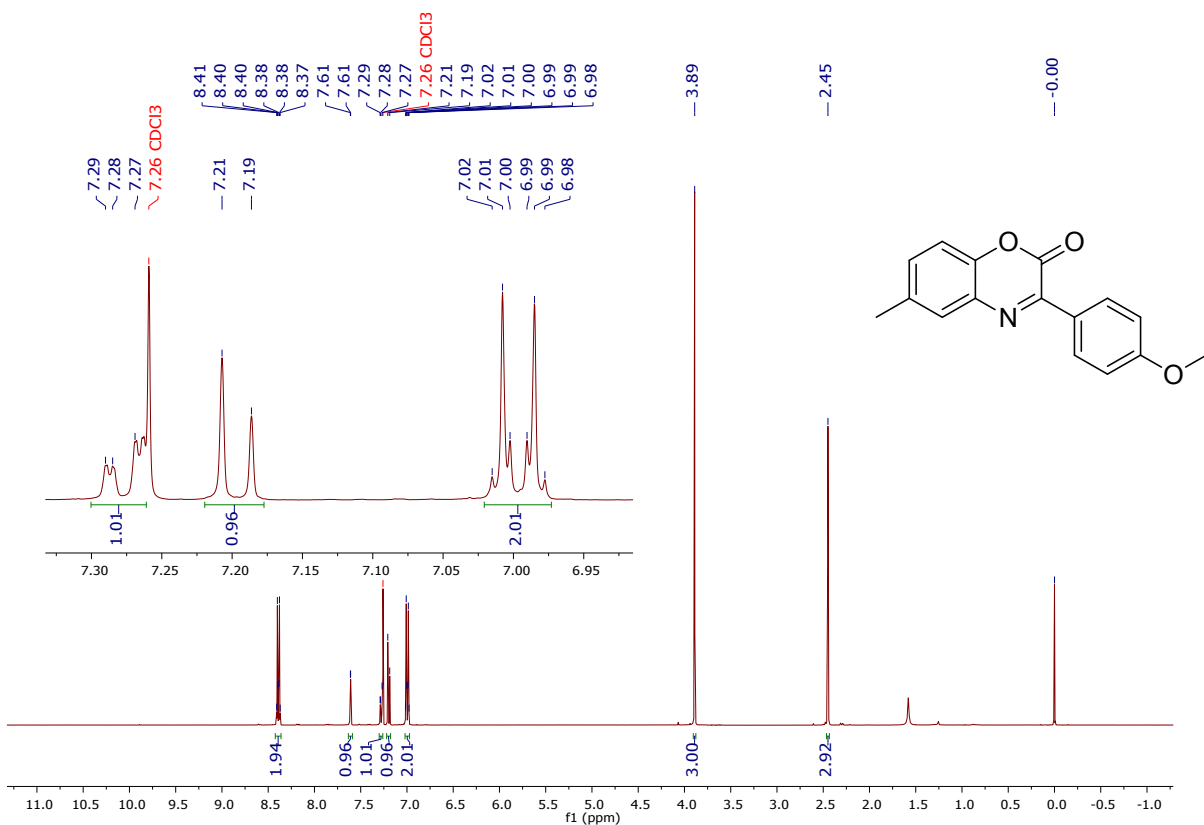

<sup>1</sup>H NMR (400 MHz, CDCl<sub>3</sub>) spectrum of 3-(4-methoxyphenyl)-6-methyl-2*H*-benzo[*b*][1,4]oxazin-2-one (**5bb**)

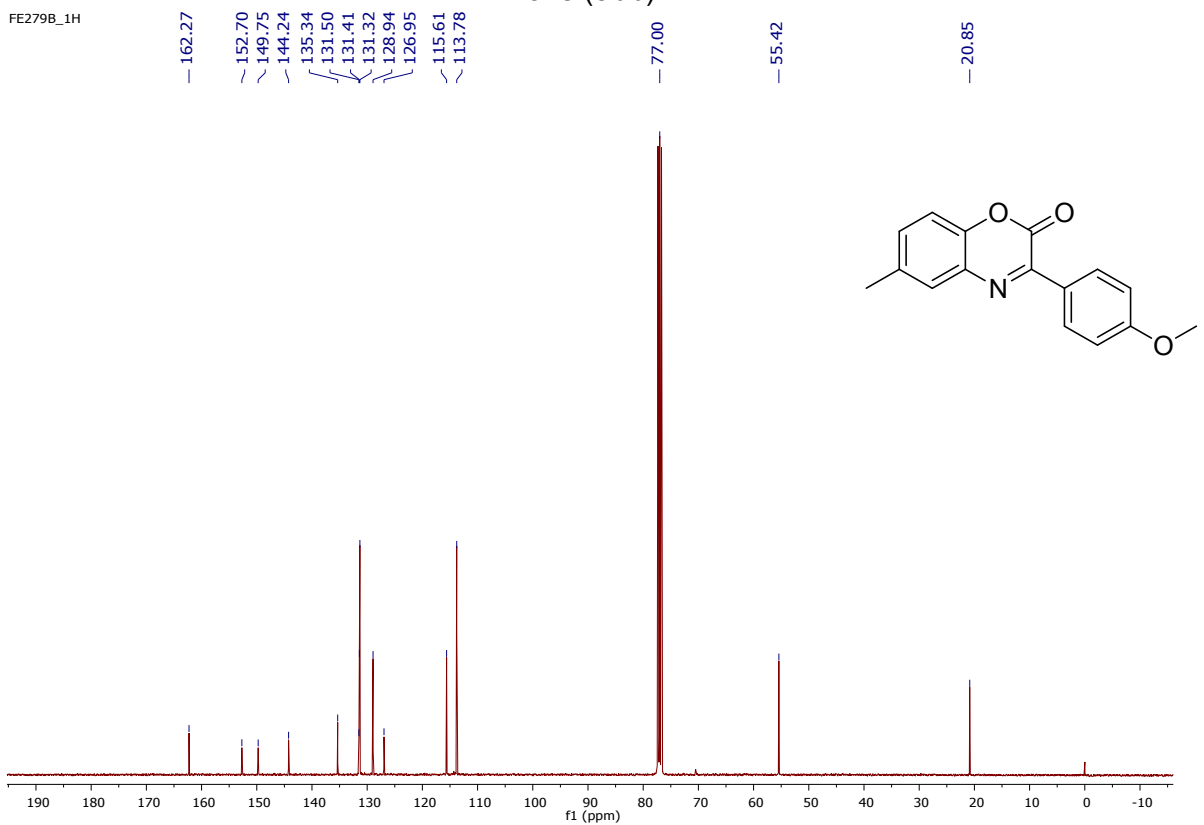

<sup>13</sup>C NMR (100 MHz, CDCl<sub>3</sub>) spectrum of 3-(4-methoxyphenyl)-6-methyl-2*H*-benzo[*b*][1,4]oxazin-2-one (**5bb**)

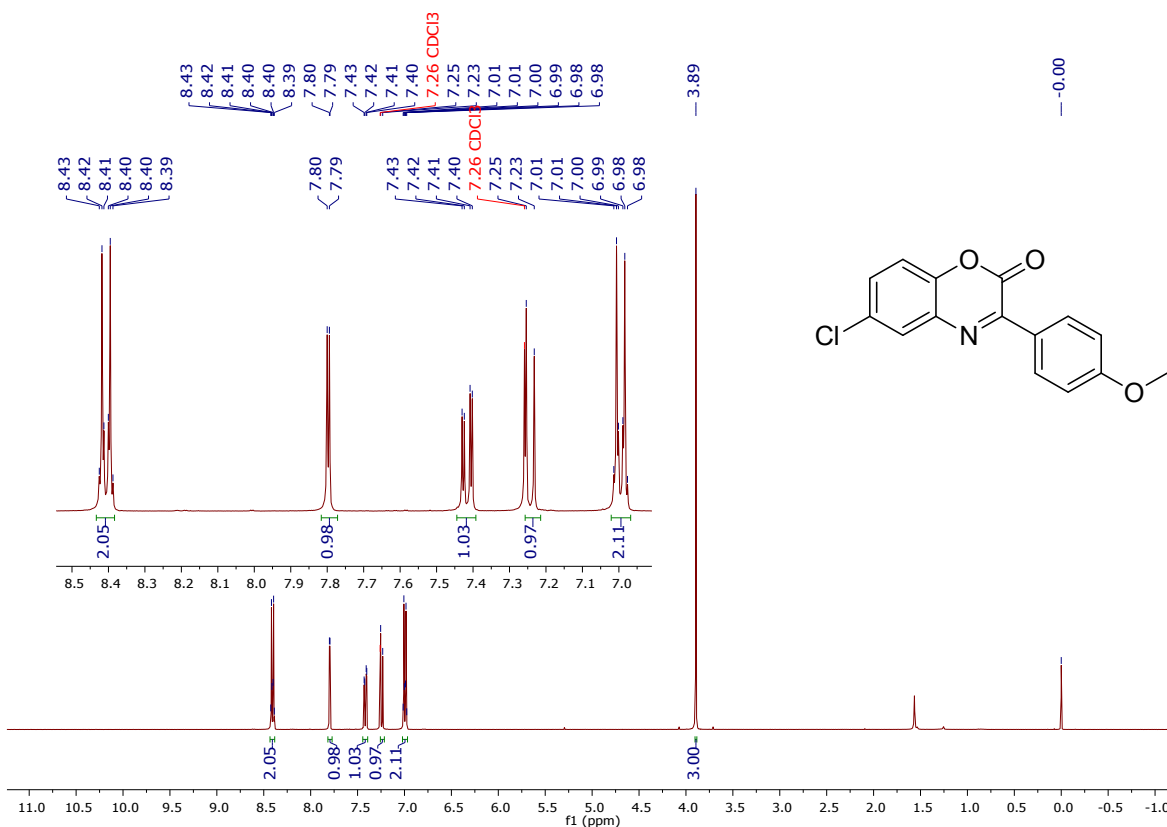

**<sup>1</sup>H NMR (400 MHz, CDCl<sub>3</sub>) spectrum of 6-chloro-3-(4-methoxyphenyl)-2H-benzo[*b*][1,4]oxazin-2-one (5bc)**

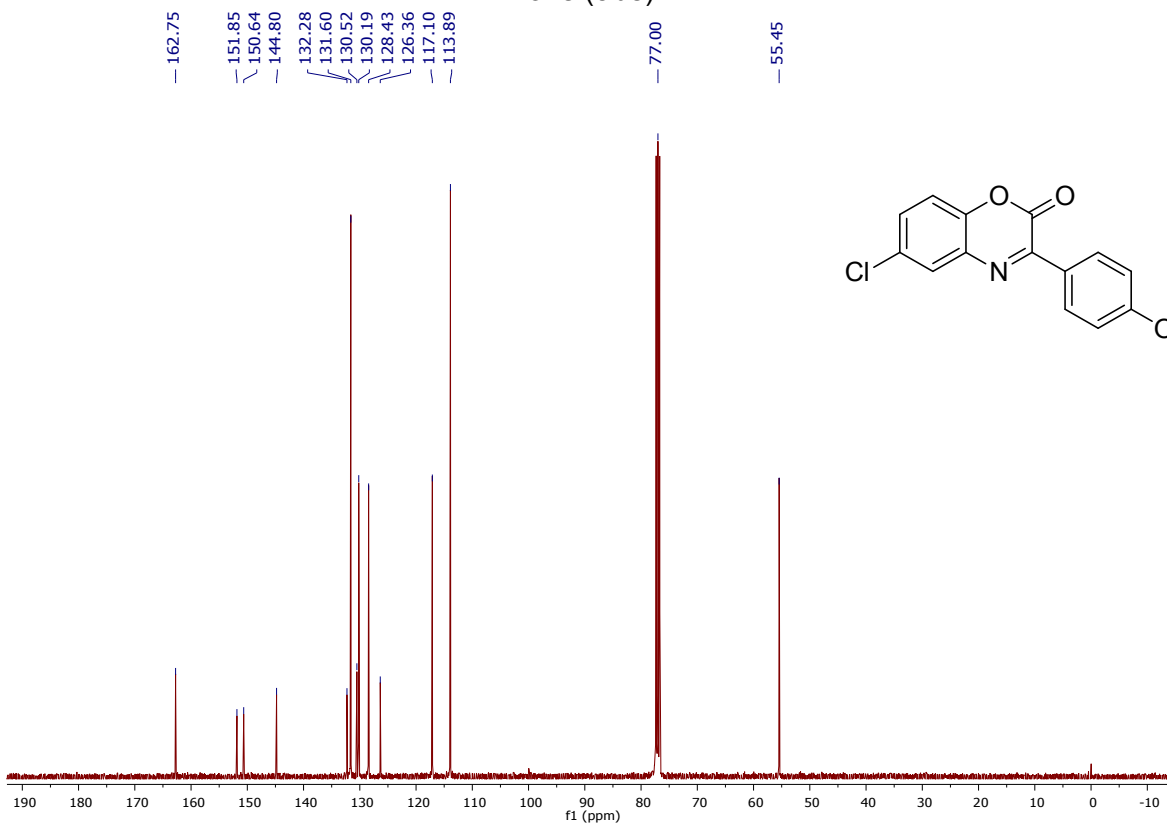

**<sup>13</sup>C NMR (100 MHz, CDCl<sub>3</sub>) spectrum of 6-chloro-3-(4-methoxyphenyl)-2H-benzo[*b*][1,4]oxazin-2-one (5bc)**



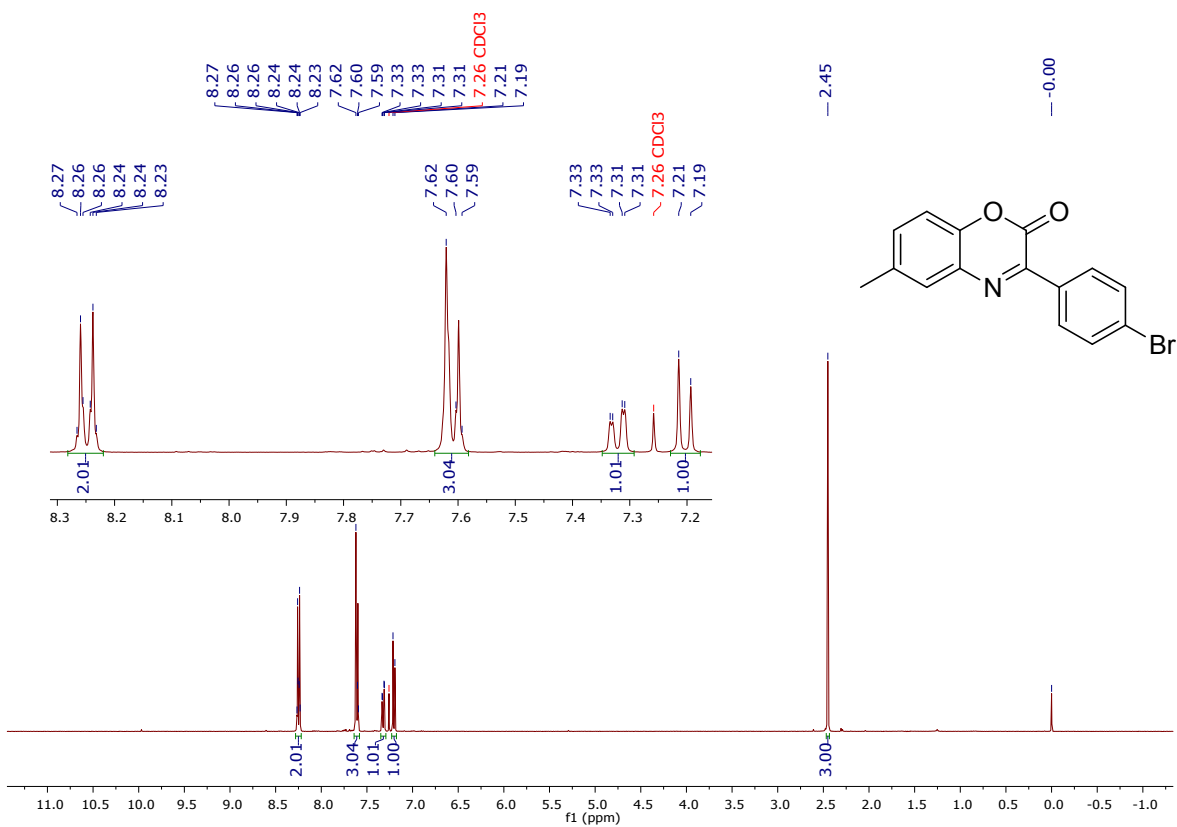

<sup>1</sup>H NMR (400 MHz, CDCl<sub>3</sub>) spectrum of 3-(4-bromophenyl)-6-methyl-2H-benzo[b][1,4]oxazin-2-one (**5cb**)

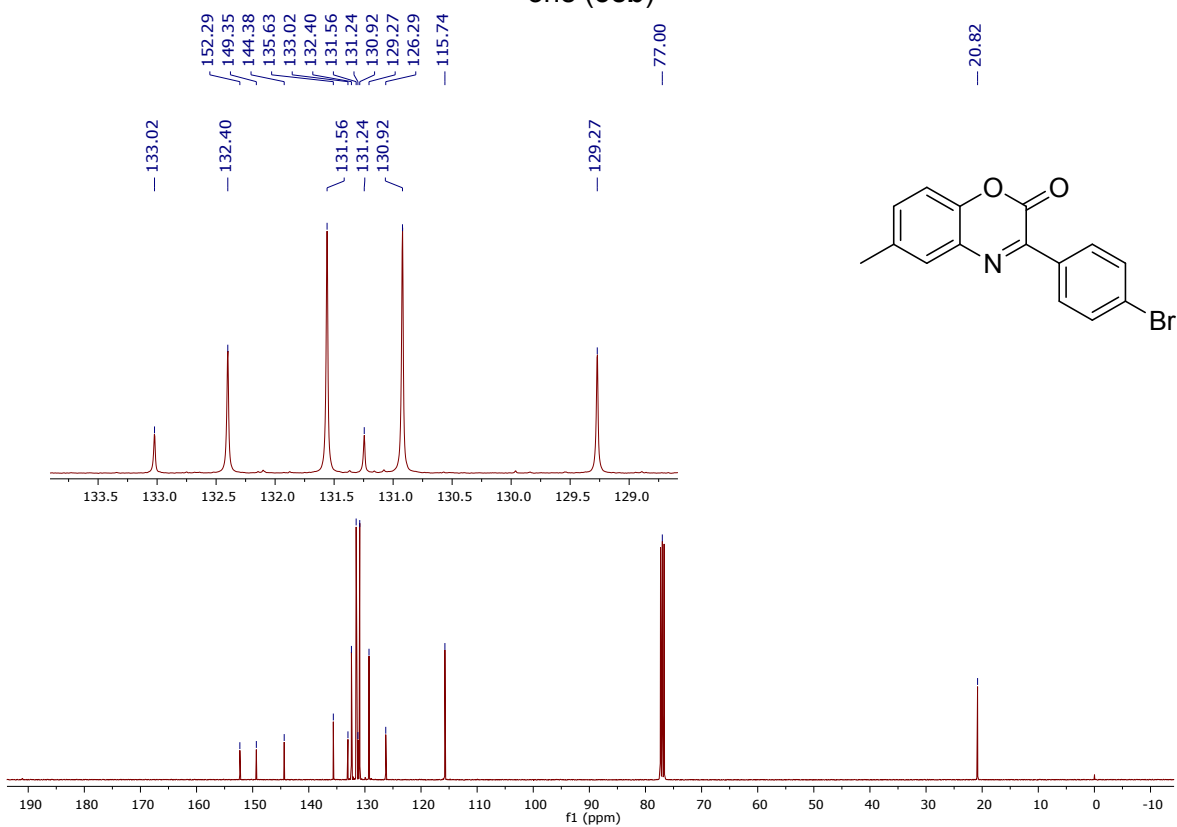

<sup>13</sup>C NMR (100 MHz, CDCl<sub>3</sub>) spectrum of 3-(4-bromophenyl)-6-methyl-2H-benzo[b][1,4]oxazin-2-one (**5cb**)



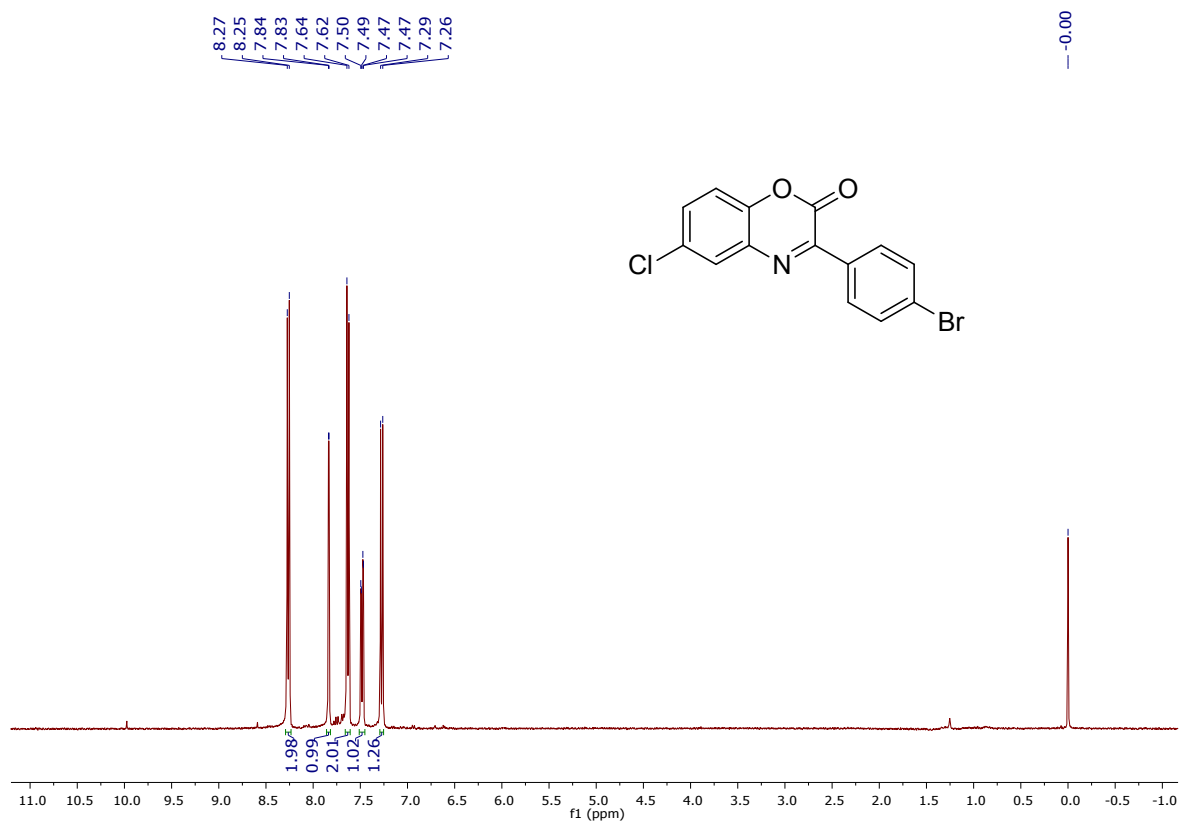

<sup>1</sup>H NMR (400 MHz, CDCl<sub>3</sub>) spectrum of 3-(4-bromophenyl)-6-chloro-2H-benzo[b][1,4]oxazin-2-one (5cc)

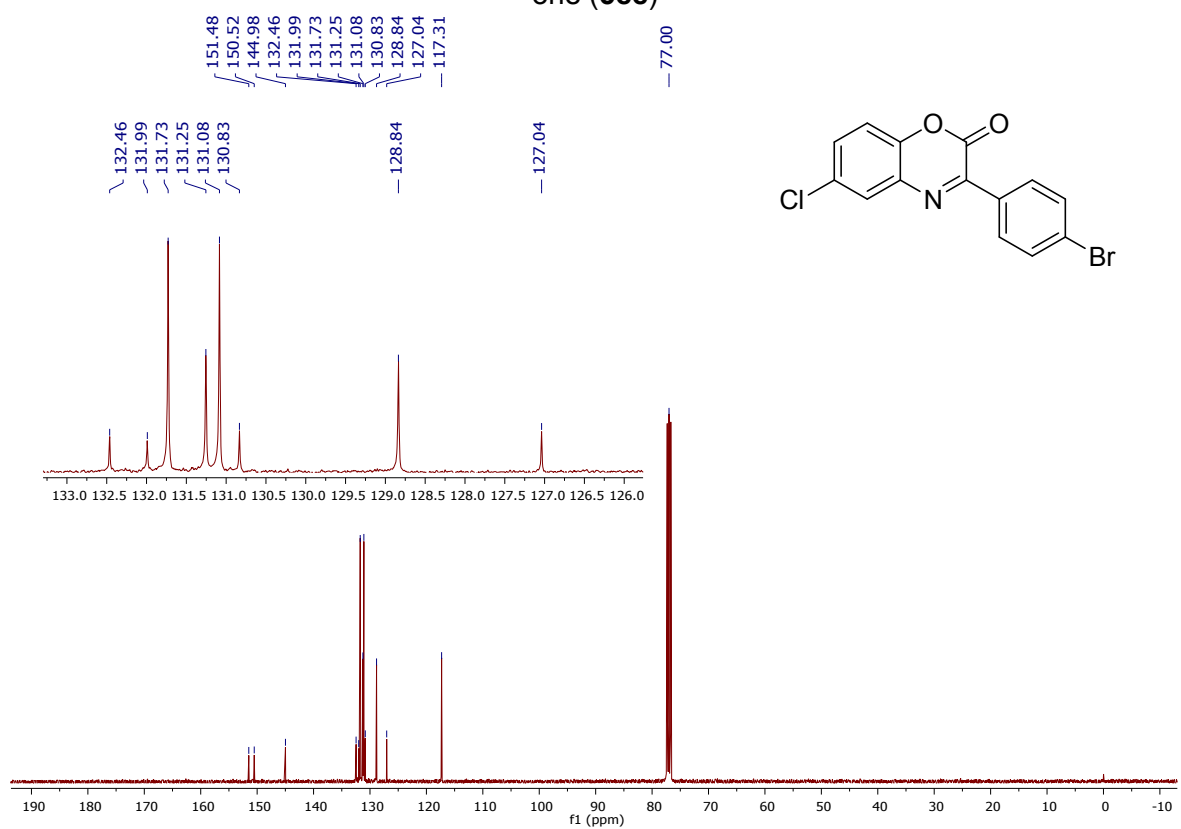

<sup>13</sup>C NMR (100 MHz, CDCl<sub>3</sub>) spectrum of 3-(4-bromophenyl)-6-chloro-2H-benzo[b][1,4]oxazin-2-one (5cc)
